# Supplementary material for: Structural Characterization of the Saccharomyces cerevisiae THO Complex by Small-Angle X-Ray Scattering
Source: PubMed Central journal article supplement (PMC4111604; doi:10.1371/journal.pone.0103470), 2014-07-25

Figure S1

A

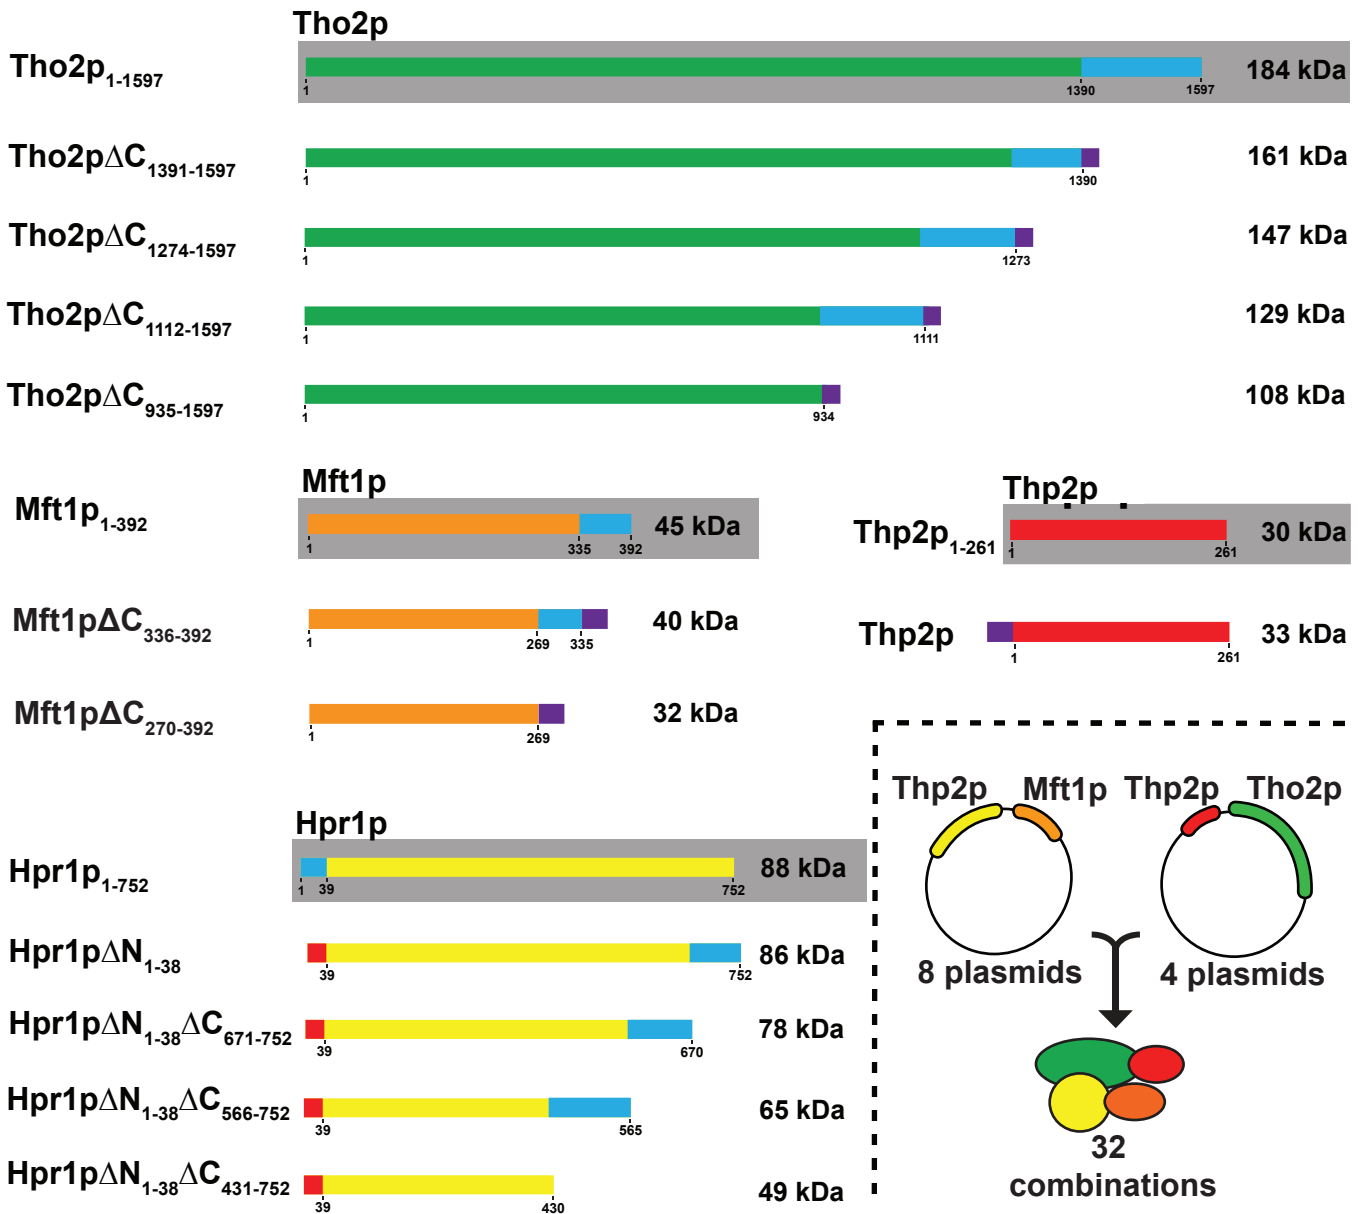

B

| Protein  | THO1   |      | THO2   |    | THO3   |    | THO4   |    |
|----------|--------|------|--------|----|--------|----|--------|----|
|          | MW     | Exp. |        |    |        |    |        |    |
| Tho2p    | 108(S) | -    | 147(S) | -  | 147(S) | -  | 161(S) | -  |
| Hpr1p    | 78(H)  | -    | 65(H)  | -  | 65(H)  | -  | 86(H)  | -  |
| Mft1p    | 40(S)  | +    | 40(-)  | -  | 40(S)  | +  | 32(S)  | +  |
| Thp2p    | 33(S)  | +    | 33(S)  | -  | 33(S)  | +  | 33(S)  | +  |
| Quantity | 1x     | 2x   | 1x     | 2x | 1x     | 2x | 1x     | 2x |

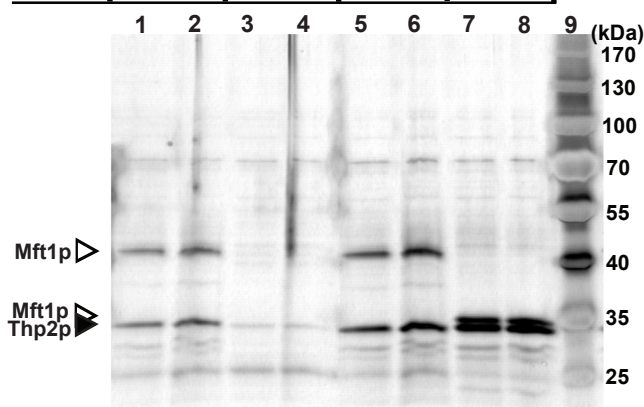

C

| Protein  | THO3   |      |    | THO5   |    |    |
|----------|--------|------|----|--------|----|----|
|          | MW     | Exp. |    |        |    |    |
| Tho2p    | 147(S) | +    |    | 129(S) | -  |    |
| Hpr1p    | 65(H)  | -    |    | 65(H)  | -  |    |
| Mft1p    | 40(S)  | +    |    | 40(S)  | +  |    |
| Thp2p    | 33(S)  | +    |    | 33(S)  | +  |    |
| Quantity | 1x     | 2x   | 5x | 1x     | 2x | 5x |

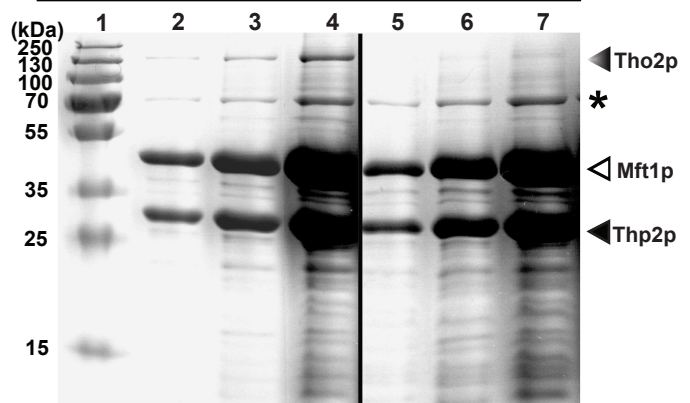

Supplement: pone.0103470.s001.pdf [file pone.0103470.s001.pdf]
