# Supplementary material for: Structural Characterization of the Saccharomyces cerevisiae THO Complex by Small-Angle X-Ray Scattering
Source: PubMed Central journal article supplement (PMC4111604; doi:10.1371/journal.pone.0103470), 2014-07-25

Figure S2

A

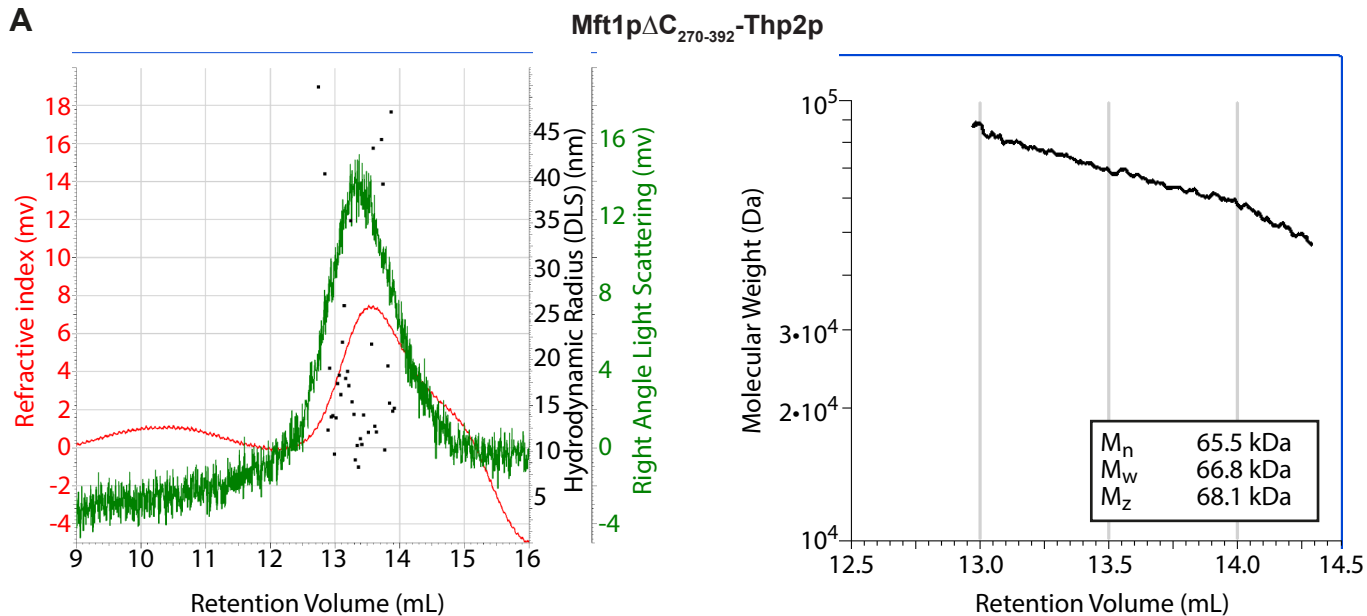

B

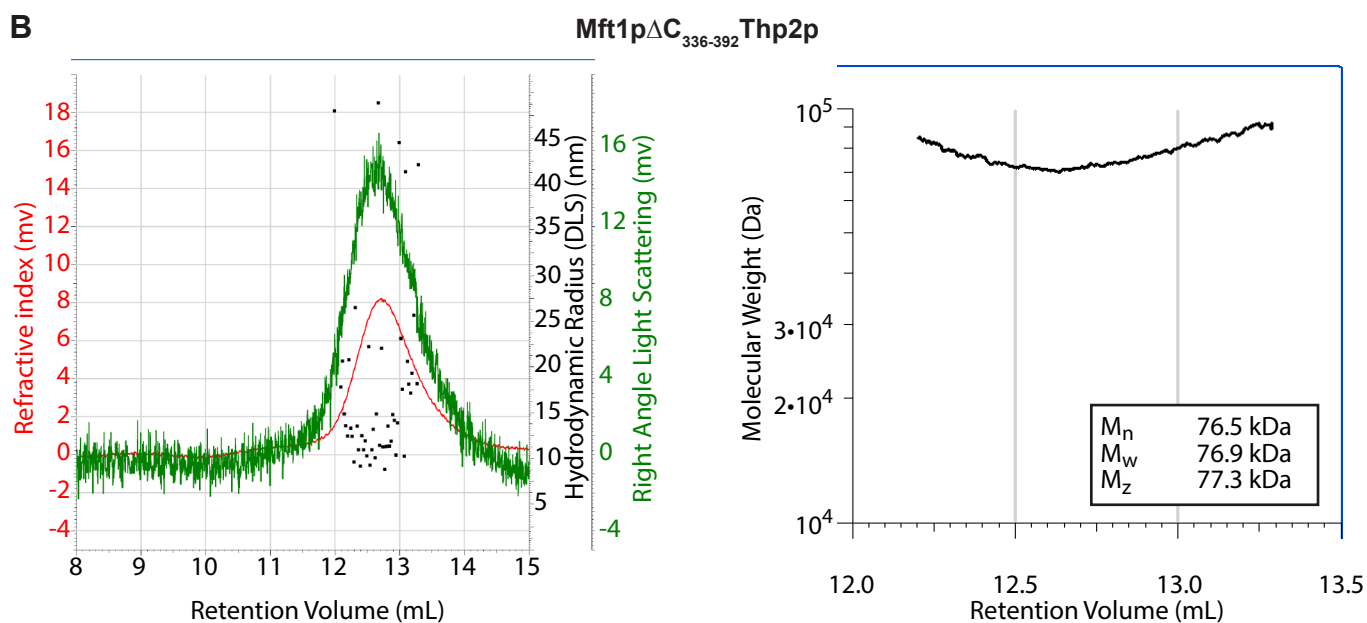

C

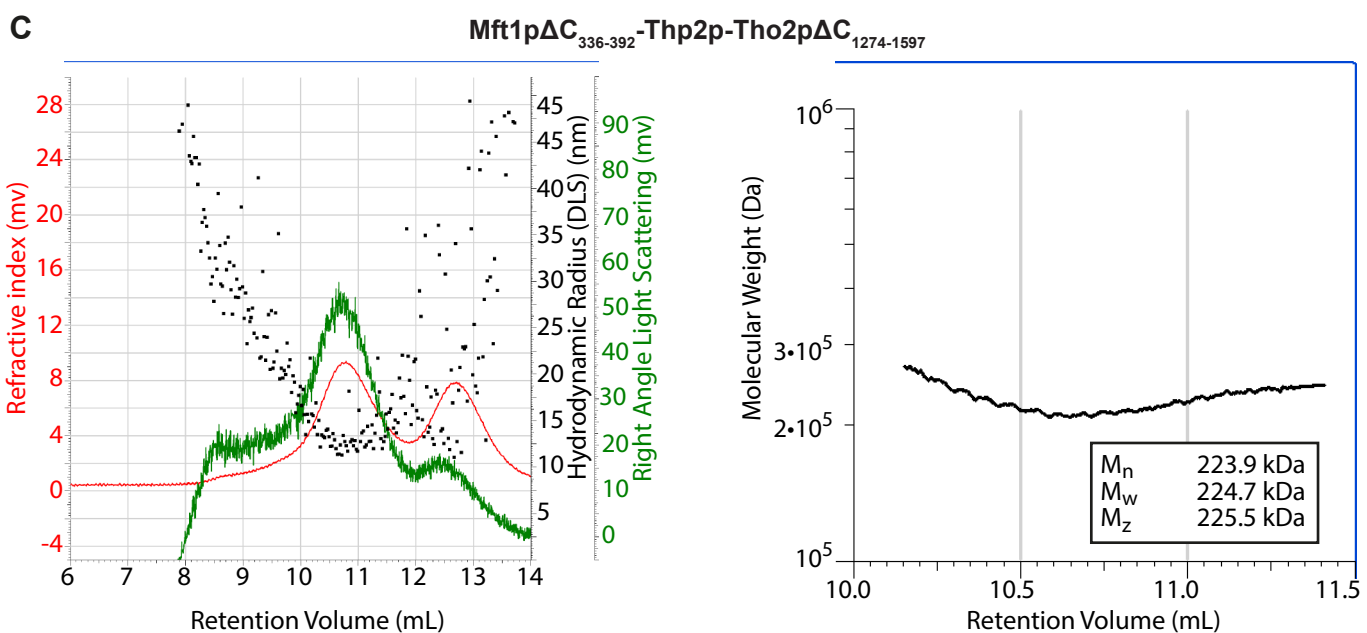

Supplement: pone.0103470.s002.pdf [file pone.0103470.s002.pdf]
