# Supplementary material for: Structural Characterization of the Saccharomyces cerevisiae THO Complex by Small-Angle X-Ray Scattering
Source: PubMed Central journal article supplement (PMC4111604; doi:10.1371/journal.pone.0103470), 2014-07-25

**Figure S3**

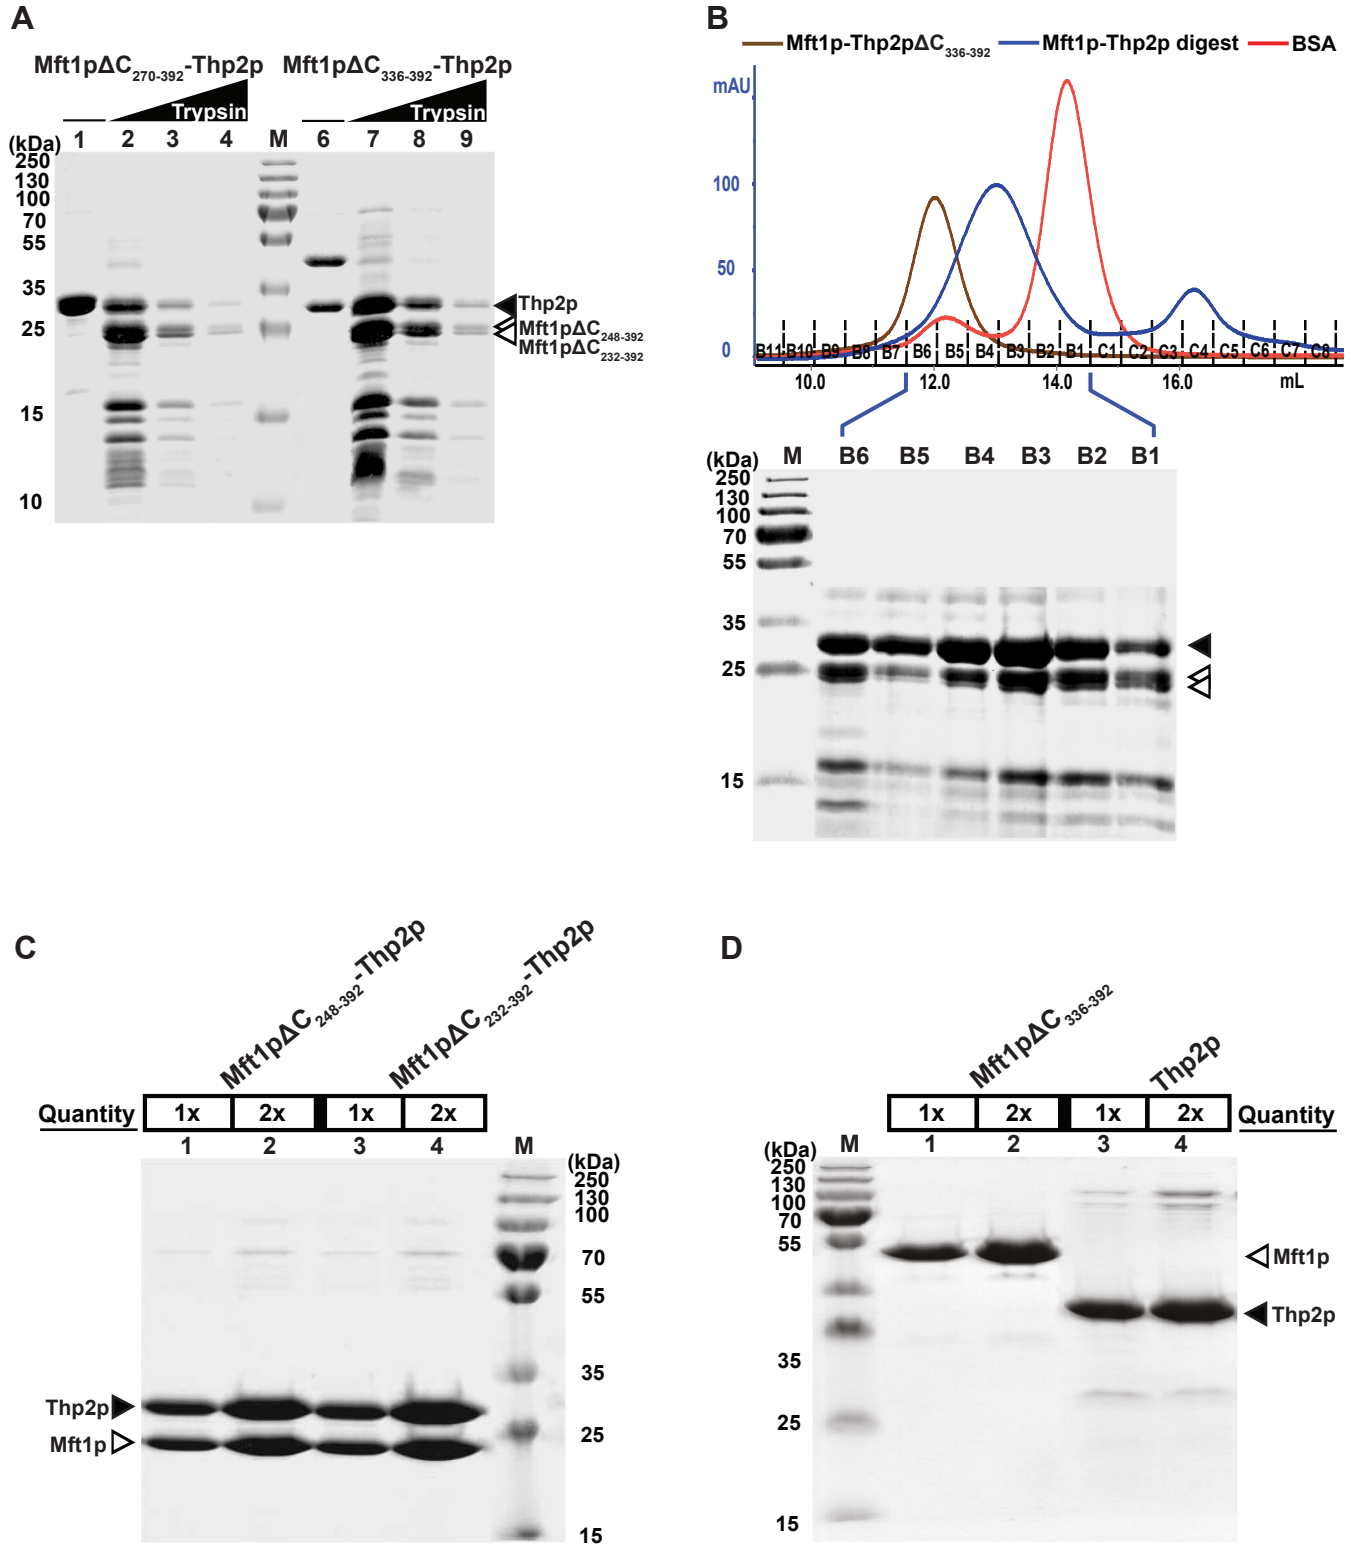

Supplement: pone.0103470.s003.pdf [file pone.0103470.s003.pdf]
