# Supplementary material for: Structural Characterization of the Saccharomyces cerevisiae THO Complex by Small-Angle X-Ray Scattering
Source: PubMed Central journal article supplement (PMC4111604; doi:10.1371/journal.pone.0103470), 2014-07-25

Figure S6

Mft1p $\Delta$ C<sub>336-392</sub>

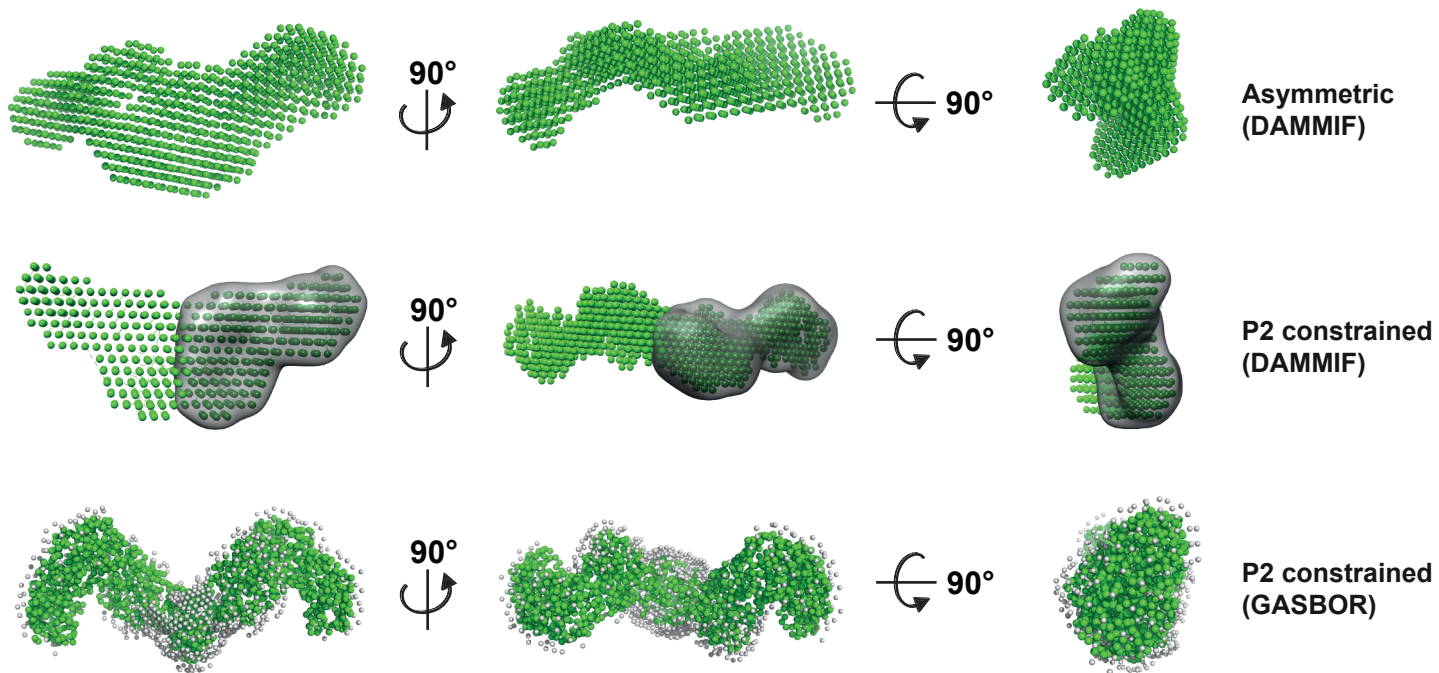

Thp2p

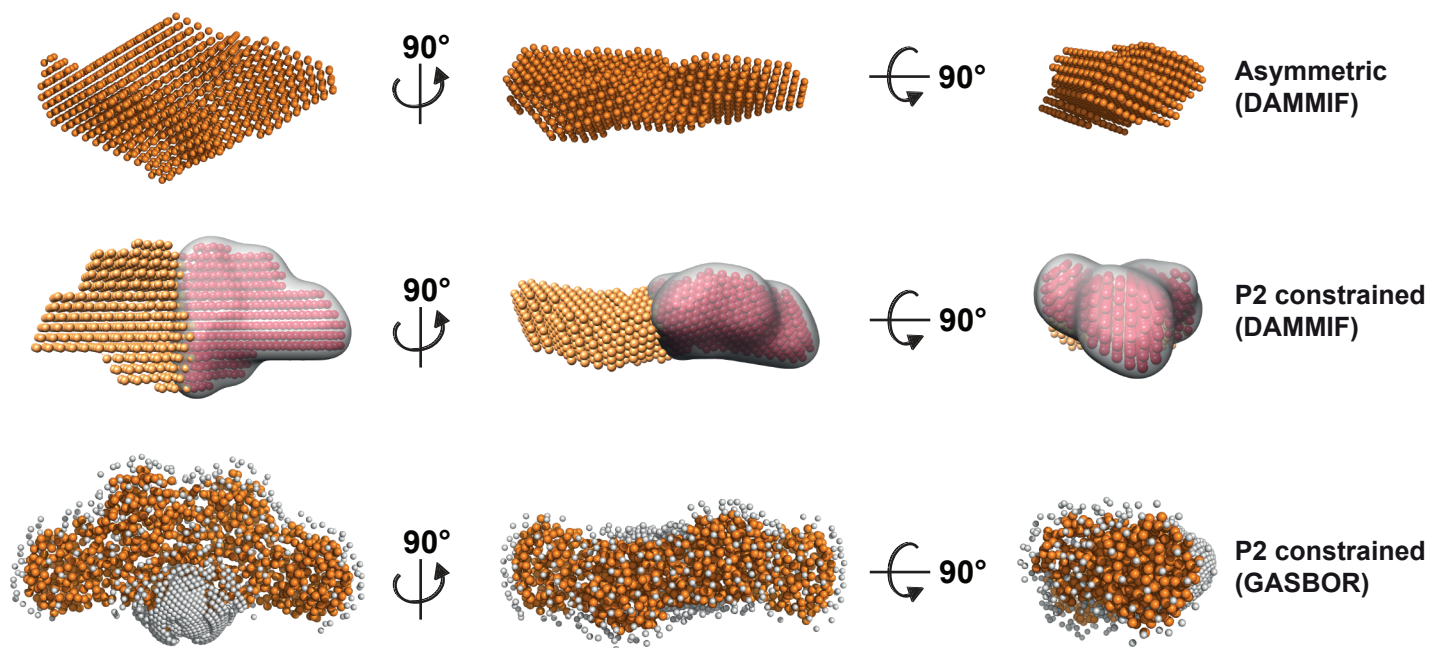

Supplement: pone.0103470.s006.pdf [file pone.0103470.s006.pdf]
