# Supplementary material for: Structural Characterization of the Saccharomyces cerevisiae THO Complex by Small-Angle X-Ray Scattering
Source: PubMed Central journal article supplement (PMC4111604; doi:10.1371/journal.pone.0103470), 2014-07-25
Supplement: pone.0103470.s009.pdf [file pone.0103470.s009.pdf]

**Table S1. Molecular parameters for each sample analysed by SAXS**

| <b>Protein/complex</b>                                             | <b>R<sub>g</sub></b><br><b>(nm)</b> | <b>D<sub>max</sub></b><br><b>(nm)</b> | <b>Measured</b><br><b>MW</b><br><b>(kDa)</b> | <b>Theoretical</b><br><b>MW</b><br><b>(kDa)</b> |
|--------------------------------------------------------------------|-------------------------------------|---------------------------------------|----------------------------------------------|-------------------------------------------------|
| <b>Thp2p</b>                                                       | 3.4                                 | 11.8                                  | 68*                                          | 33 (66)                                         |
| <b>Mft1pΔC<sub>336-392</sub></b>                                   | 4.7                                 | 16.3                                  | 82                                           | 40 (80)                                         |
| <b>Mft1pΔC<sub>232-392</sub>-Thp2p</b>                             | 3.8                                 | 13.4                                  | 53                                           | 59                                              |
| <b>Mft1pΔC<sub>336-392</sub>-Thp2p</b>                             | 4.6                                 | 16.0                                  | 71                                           | 73                                              |
| <b>Mft1pΔC<sub>336-392</sub>-Thp2p-Tho2pΔC<sub>1274-1597</sub></b> | 6.5                                 | 22.9                                  | 203                                          | 220                                             |
